# Supplementary material for: Friendly-rivalry solution to the iterated n-person public-goods game
Source: PLOS journal article supplement (doi:10.1371/journal.pcbi.1008217), 2021-01-21
Supplement: S1 (10.1371/journal.pcbi.1008217.s001) [file journal.pcbi.1008217.s001]

# Supporting Information

Friendly-rivalry solution to the iterated  $n$ -person  
public-goods game

Yohsuke Murase

RIKEN Center for Computational Science, Kobe, Hyogo 650-0047, Japan

Seung Ki Baek

Department of Physics, Pukyong National University, Busan 48513, Korea

December 30, 2020

# Supporting information

## S1 Appendix. Computational check for efficiency, defensibility, and distinguishability

### Efficiency

The most direct method for checking efficiency is to construct a Markovian transition matrix. For example, if we check efficiency of WSLs, the matrix can be written as

$$\begin{array}{c}
 h_t \\
 \begin{array}{c}
 (c, c) \\
 (c, d) \\
 (d, c) \\
 (d, d)
 \end{array}
 \end{array}
 \begin{array}{c}
 h_{t-1} \\
 \begin{array}{c}
 (c, c) \quad (c, d) \quad (d, c) \quad (d, d)
 \end{array}
 \end{array}
 \left[ \begin{array}{cccc}
 (1 - \epsilon)^2 & \epsilon^2 & \epsilon^2 & (1 - \epsilon)^2 \\
 \epsilon(1 - \epsilon) & \epsilon(1 - \epsilon) & \epsilon(1 - \epsilon) & \epsilon(1 - \epsilon) \\
 \epsilon(1 - \epsilon) & \epsilon(1 - \epsilon) & \epsilon(1 - \epsilon) & \epsilon(1 - \epsilon) \\
 \epsilon^2 & (1 - \epsilon)^2 & (1 - \epsilon)^2 & \epsilon^2
 \end{array} \right], \quad (\text{S1})$$

where each element is the conditional probability to observe  $h_t = (A_t, B_t)$  for given  $h_{t-1} = (A_{t-1}, B_{t-1})$ . The stationary probability distribution of the above process can be calculated explicitly if  $m$  is small [1], but it is often easier to obtain a numerical solution, e.g., by using the QR algorithm [2]. If the stationary probability of full cooperation approaches 100% as  $\epsilon$  decreases, the strategy is judged as efficient.

Note that the above direct method calculates the effect of every possible type of error all at once. A quicker way is to look at the connection structure of history profiles [3], and let us only outline the idea briefly: In the above example of WSLs, suppose that  $\epsilon = 0$  as the zeroth-order approximation of the actual process. It is then immediately clear that from every initial condition the players should eventually end up with  $(c, c)$  and stay there. Once this is the case, we can prove that the existence of  $\epsilon \ll 1$  perturbs the stationary distribution only to a marginal degree so that we will actually get the same answer as  $\epsilon \rightarrow 0^+$ . Or, if the zeroth-order approximation fails to give such a definite answer, then we have to modify the connection structure to the first order by including transitions with probability of  $O(\epsilon)$ . This process is repeated with increasing the order of  $\epsilon$  one by one, until we reach the answer. One may refer to Ref. [3] for the details.

## Defensibility

When a focal player's strategy is given, his or her action is determined at every history profile, whereas the other  $(n - 1)$  co-players' are not. Therefore, each history profile can lead to  $2^{n-1}$  possible history profiles in the next round. If each history profile is regarded as a node, we thus obtain a connection structure in which every node has  $2^{n-1}$  outward links. At every node, we can see the focal player's instantaneous payoff based on the actions taken in round  $t$ . The point is that we are concerned about the focal player's long-term average payoff, to which only results from cyclic loops can contribute. The basic idea for checking defensibility is thus to find all the loops in the connection structure: If a loop puts the focal player at a payoff disadvantage compared with the co-players, let us call it a negative loop. If the connection structure contains no such negative loops, the corresponding strategy is defensible because it is impossible to make the player's long-term average payoff lower than the co-players' no matter what they choose. To detect all the negative loops, we have used the Floyd-Warshall algorithm [4, 5, 3].

## Distinguishability

The distinguishability criterion can be checked in a similar way to the one for the efficiency criterion because it is essentially determined from the stationary distribution. For example, we can construct a transition matrix between a given strategy and AllC as in Eq. (S1). For the strategy to be distinguishable, the stationary distribution must keep a finite amount of probability to observe defection against AllC as  $\epsilon \rightarrow 0^+$ .

## References

- [1] T. You, M. Kwon, H.-H. Jo, W.-S. Jung, S. K. Baek, Chaos and unpredictability in evolution of cooperation in continuous time, *Phys. Rev. E* 96 (6) (2017) 062310.
- [2] M. E. J. Newman, *Computational Physics*, CreateSpace Independent, San Bernardino, CA, 2013.
- [3] Y. Murase, S. K. Baek, Five rules for friendly rivalry in direct reciprocity, *Sci. Rep.* 10 (2020) 16904.
- [4] S. Hougardy, The Floyd–Warshall algorithm on graphs with negative cycles, *Inf. Process. Lett.* 110 (8-9) (2010) 279–281.
- [5] Y. Murase, S. K. Baek, Seven rules to avoid the tragedy of the commons, *J. Theor. Biol.* 449 (2018) 94–102.
